# Supplementary material for: Composites based on nitroprusside cyano-bridged coordination polymer particles and chitosan for NO delivery
Source: Royal Society of Chemistry journal article supplement (doi:10.1039/d2nj04711j), 2022-11-28
Supplement: d2nj04711j1.pdf [file d2nj04711j1.pdf]

## Supplementary Information

### Composites based on nitroprusside cyano-bridged coordination polymers particles and chitosan for NO delivery

Melvyn Gorra,<sup>a</sup> Frantz Ndebulia Watchou,<sup>a</sup> Maria A. Palacios,<sup>b</sup> Jérôme Long,<sup>a</sup> Saad Sene,<sup>a</sup> Gautier Félix,<sup>a</sup> Nathalie Tanchoux,<sup>a</sup> Françoise Quignard,<sup>a</sup> Joulia Larionova<sup>a</sup> and Yannick Guari<sup>a\*</sup>

#### Modelling

##### Production of NO<sub>(g)</sub>

The NO is generated by a light irradiation of coordination polymer based on nitroprusside material. The light irradiation produces the following chemical reaction:

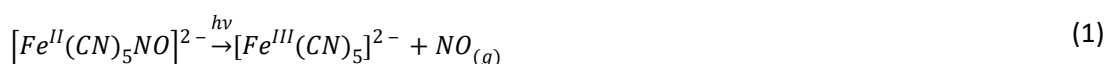

Its kinetic is characterised by the reaction rate constant  $k_{NO}$  (s<sup>-1</sup>) and the  $[Fe^{II}(CN)_5NO]$  concentration:

$$\frac{\partial [Fe^{II}(CN)_5NO]}{\partial t} = -k_{NO} \cdot [Fe^{II}(CN)_5NO] \quad (2)$$

The result of this equation is:

$$[Fe^{II}(CN)_5NO] = C_{TOT-NO} \cdot e^{-k_{NO} \cdot t} \quad (3)$$

with  $C_{TOT-NO}$  which is the maximal concentration of NO that the starting material can produce (mol.m<sup>-3</sup>).

The  $[NO_{(g)}]$  concentration can be written as a function of  $[Fe^{II}(CN)_5NO]$  and  $C_{TOT-NO}$ :

$$[NO_{(g)}] = C_{TOT-NO} - [Fe^{II}(CN)_5NO] \quad (4)$$

and

$$[NO_{(g)}] = C_{TOT-NO} (1 - e^{-k_{NO} \cdot t}) \quad (5)$$

##### Diffusion model

In this model we consider that the concentration of NO<sub>(g)</sub> represented by  $c$  (mol.m<sup>-3</sup>) follows the diffusion equation:

$$\frac{\partial c}{\partial t} + D \cdot \Delta c = f \quad (6)$$

with  $f$  which is a volume source term (mol.(m<sup>-3</sup>.s<sup>-1</sup>)) corresponding to the quantity of NO produced by the irradiation of the starting material as a function of the time, and  $D$  (m<sup>2</sup>.s<sup>-1</sup>) the diffusion coefficient of NO in the volume:

$$f = \frac{\partial[NO_{(g)}]}{\partial t} = C_{TOT-NO} \cdot k_{NO} \cdot e^{-k_{NO} \cdot t} \quad (7)$$

In order to take into account the evacuation of the  $NO_{(g)}$  outside the material after release, we consider that the  $NO_{(g)}$  molecules on the surface will be directly desorbed:

$$D \cdot \vec{n} \cdot \vec{\nabla} c = -q_{out} \cdot c \quad (8)$$

with  $q_{out} \gg 1 \mu\text{m} \cdot \text{days}^{-1}$  (in our case).

Then  $c_{lib}$  ( $\text{mol} \cdot \text{m}^{-2}$ ) the quantity per unit of surface of  $[NO_{(g)}]$  liberated on a point  $P$  at a position  $(x, y)$  on a surface is counted using the following equation:

$$\frac{\partial c_{lib}(t, x, y)}{\partial t} = q_{out} \cdot c(t, x, y) \quad (9)$$

The total quantity of liberated  $NO_{(g)}$  ( $c_{lib, TOT}$ ) is:

$$c_{lib, TOT}(t) = \iint_S c_{lib}(t, x, y) dS \quad (10)$$

Now if we make the assumption that the volume concentration  $c$  and  $C_{TOT-NO}$  are homogeneous in the  $x$  and  $y$  directions, and that lengths in  $x$  and  $y \gg$  length in  $z$ , then we can deduce from equation (6) an equation of surface concentration as a function of  $z$ :

$$\frac{\partial c}{\partial t} + D \cdot \frac{\partial^2 c}{\partial z^2} = \frac{C_{TOT-NO} \cdot k_{NO} \cdot e^{-k_{NO} \cdot t}}{L} \quad (11)$$

and:

$$\frac{\partial c_{lib}}{\partial t} = q_{out} \cdot c \quad (12)$$

With now  $c$  (in  $\text{mol} \cdot \text{m}^{-1}$ ),  $C_{TOT-NO}$  (in mol) and where  $L$  is the thickness of PBA material in the  $z$  direction we obtain the total quantity of liberated  $NO_{(g)}$   $c_{lib}$  in mol (or in  $\text{mol} \cdot \text{g}^{-1}$ ) if we normalize with the mass of the sample).

### Surface effect

The SEM-EDX measurements show that the density of  $Ag_2[Fe(CN)_5(NO)]$  particles is higher on the surface of the film in comparison with the  $Fe^{2+}$  analogue, indicating a higher amount of  $NO_{(g)}$  which can be liberated by the surface. To take into account this phenomenon, the surface conditions are modified as follows:

$$D \cdot \vec{n} \cdot \vec{\nabla} c = C_{S-NO} \cdot k_{NO} \cdot e^{-k_{NO} \cdot t} - q_{out} \cdot c \quad (13)$$

with  $C_{S-NO}$  a surface source term in mol for equation (6) or in  $\text{mol} \cdot \text{g}^{-1}$  (if we normalize with the mass of the sample).

Equation (11) becomes:

$$\frac{\partial c}{\partial t} + D \cdot \frac{\partial^2 c}{\partial z^2} = \frac{(C_{TOT-NO} - C_{S-NO}) \cdot k_{NO} \cdot e^{-k_{NO} \cdot t}}{L} \quad (14)$$

### Diffusion flux

The diffusion flux  $J$  in ( $\text{mol} \cdot \text{m}^{-2} \cdot \text{s}^{-1}$ ) represents the quantity of molecules which passes through a surface unit in a time unit. It is defined as follows:

$$\vec{J} = -D \cdot \vec{\nabla} c \quad (13)$$

### Tables

Table S1. IR characteristic bands' assignment

| Pristine chitosane | 1@chit                | 1    | 2@chit                | 2             | Assignements                |
|--------------------|-----------------------|------|-----------------------|---------------|-----------------------------|
| -                  | 3838                  | 3844 | 3844                  | 3854          | Overtone $\nu$ (NO)         |
| 3323               | 3431                  | 3659 | 3410                  | 3443          | $\nu$ (OH)                  |
| 3291               | -                     | 3387 | -                     | -             | $\nu$ (OH)                  |
| 2917               | 2917                  | -    | 2920                  | -             | $\nu_s$ (CH)                |
| 2863               | 2888                  | -    | 2873                  | -             | $\nu_{as}$ (CH)             |
| -                  | 2182,<br>2145<br>(sh) | 2182 | 2177<br>(sh),<br>2141 | 2177,<br>2163 | $\nu$ (CN)                  |
| -                  | 2145                  | 2147 | 2141                  | 2163          | $\nu$ (CN)                  |
| -                  | 1941                  | 1941 | 1924                  | 1937          | $\nu$ (NO)                  |
| 1651               | 1654                  | -    | 1644                  | -             | $\nu$ (CO)                  |
| -                  | -                     | 1616 | -                     | 1625          | $\delta$ (OH)               |
| 1558               | 1525                  | -    | 1543                  | -             | $\delta$ (NH)               |
| 1420               | -                     | -    | 1422                  | -             | $\nu$ (CH-OH)               |
| 1375               | 1378                  | -    | 1367                  | -             | $\nu$ (CH <sub>2</sub> -OH) |
| 1065               | 1080                  | -    | 1053                  | -             | $\nu$ (C-O-C)               |

|   |     |     |     |     |                  |
|---|-----|-----|-----|-----|------------------|
| - | 664 | 666 | 659 | 662 | $\delta$ (Fe-NO) |
| - | 522 | 520 | 507 | 516 | $\nu$ (Fe-CN)    |
| - | 431 | 443 | 414 | 418 | $\delta$ (Fe-CN) |

## Figures

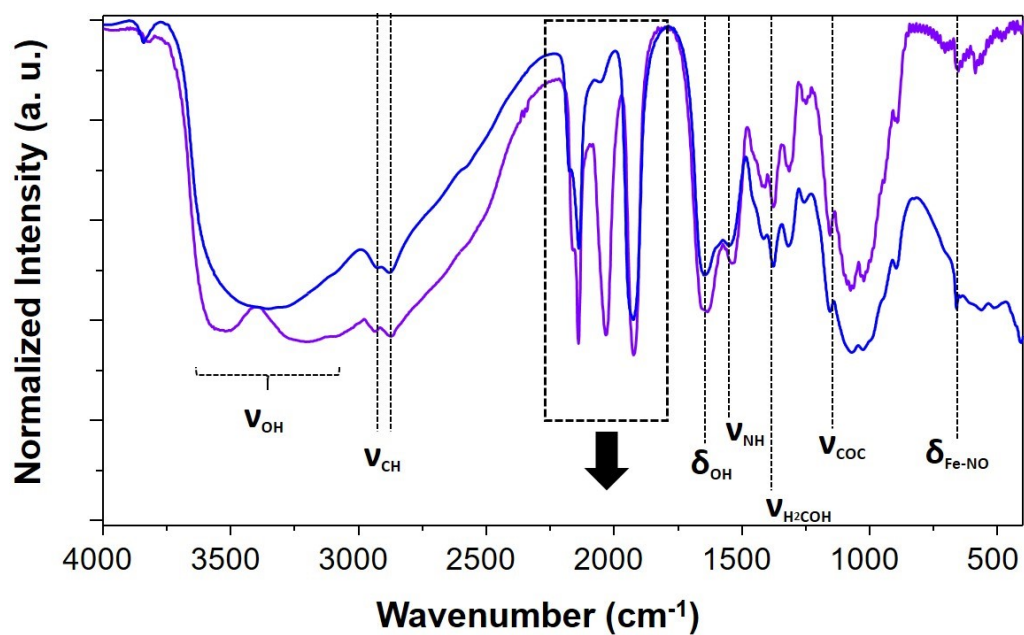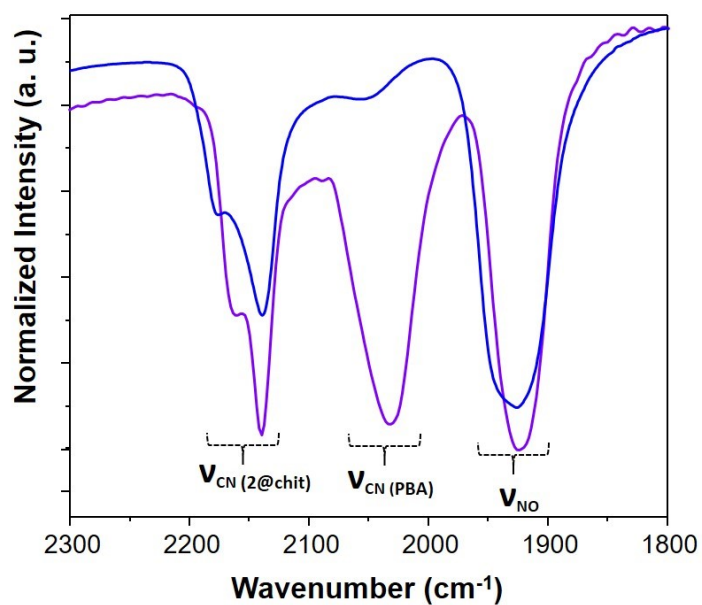

**Figure S1.** IR spectra of **2@chit** before (blue) and after (purple) NO release; (up) spectral window 4000 - 400  $\text{cm}^{-1}$ , (down) spectral window 2300 - 1800  $\text{cm}^{-1}$

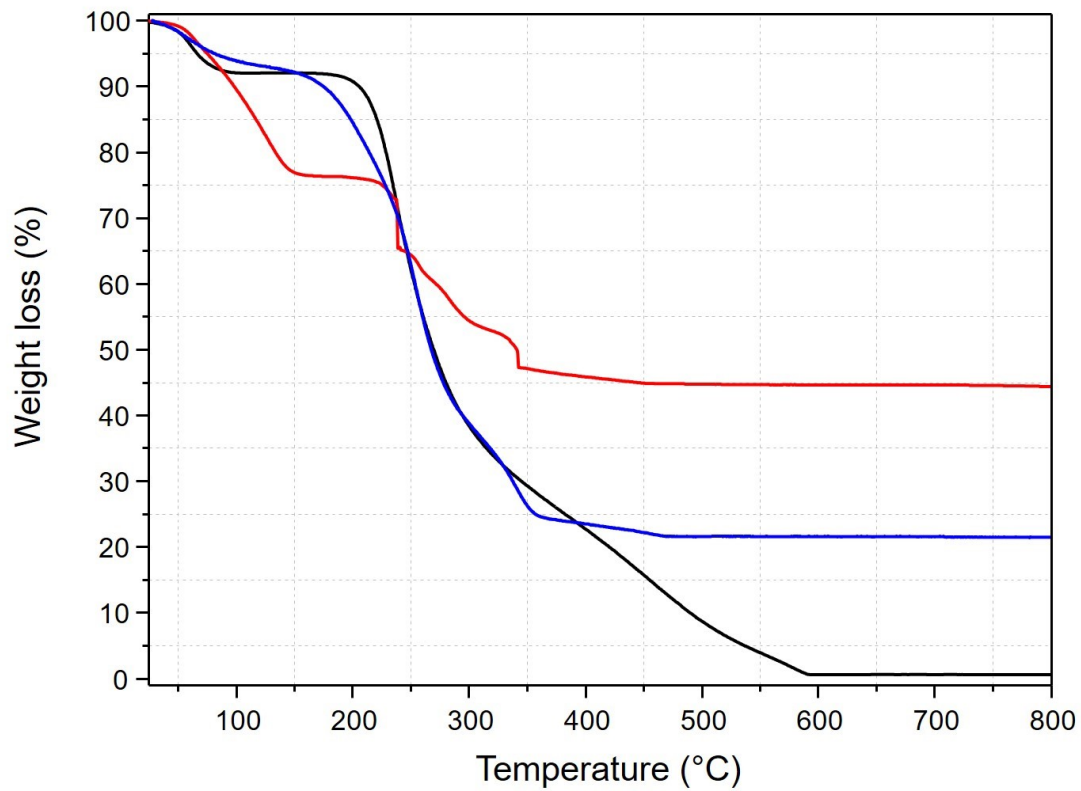

**Figure S2.** TGA curves of chitosan film (black), **1** (red) and **1@chit** (blue).

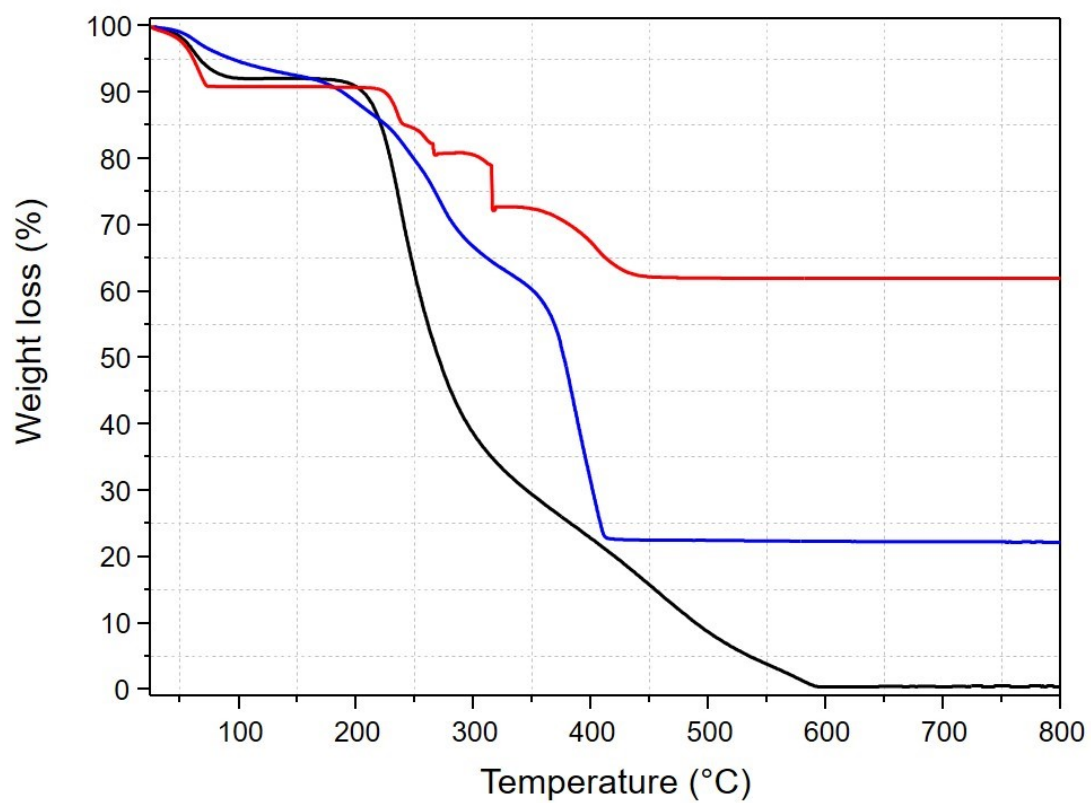

**Figure S3.** TGA curves of chitosan film (black), **2** (red) and **2@chit** (blue).

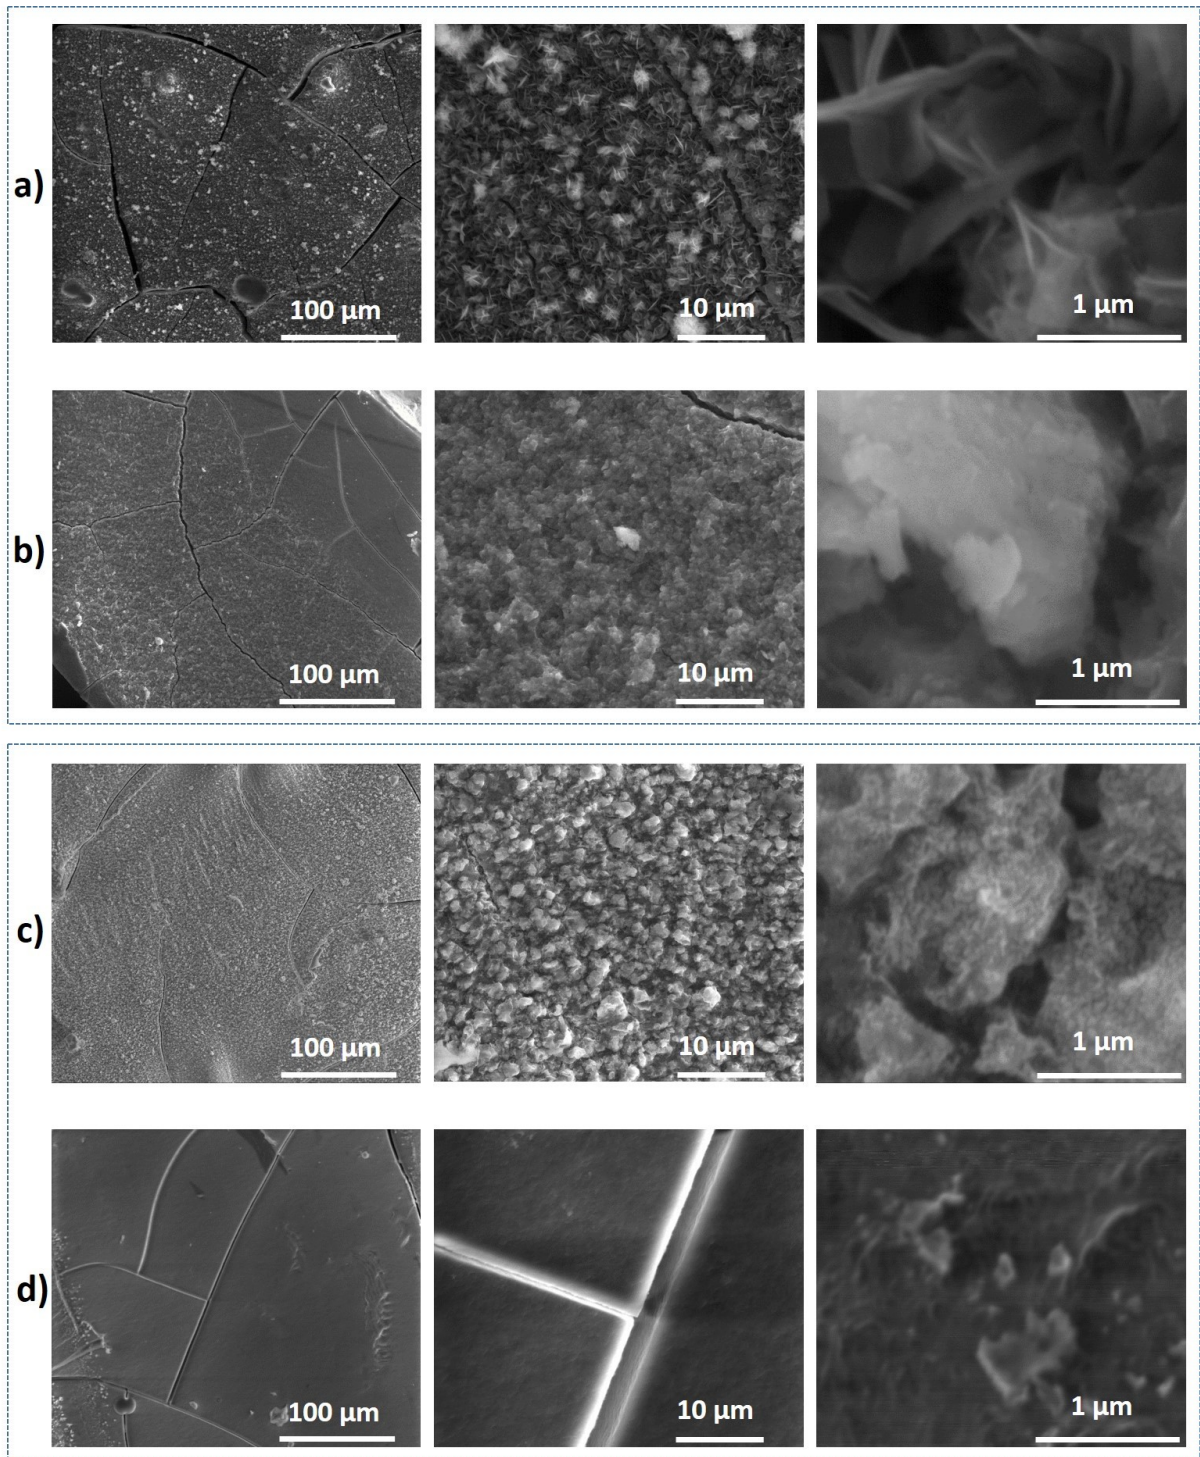

**Figure S4.** SEM images of the composites (top) **1@chit** : (a) surface and (b) its transversal cut; (bottom) **2@chit** : (c) surface, (d) transversal cut.

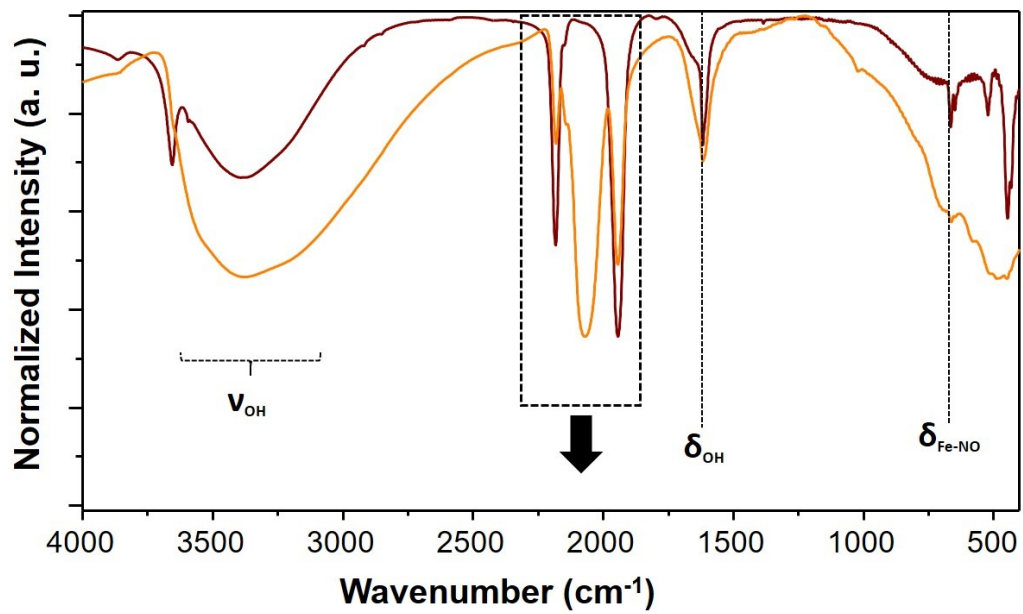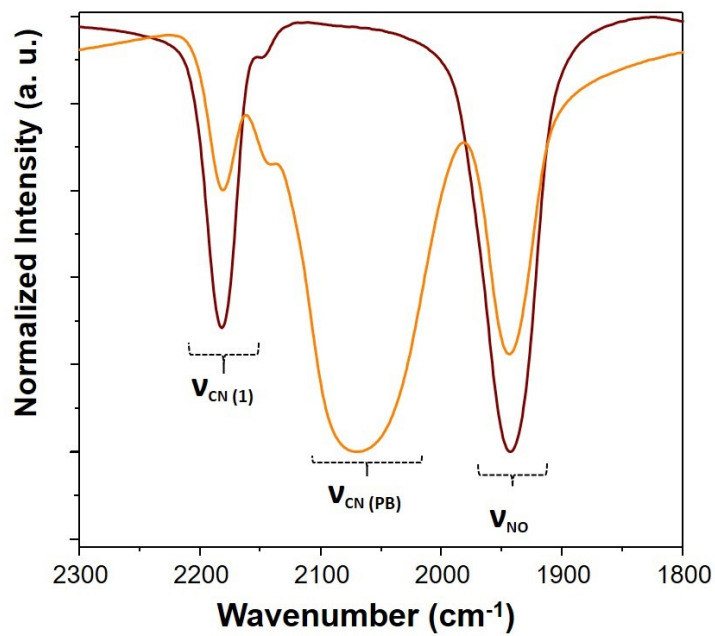

**Figure S5.** IR spectra f 1 before (brown) and after (orange) NO release; (up) spectral window 4000 - 400  $\text{cm}^{-1}$ , (down) spectral window 2300 - 1800  $\text{cm}^{-1}$



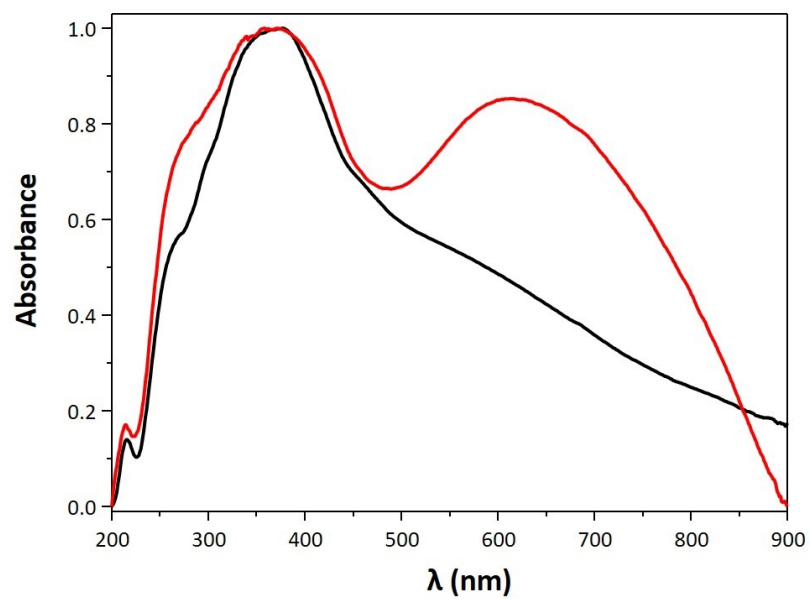

**Figure S6.** UV-Vis spectra of the nanocomposite **1@chit** before (black) and after (red) irradiation.
